# Supplementary material for: Comparative Study of the Difference in Behavior of the Accessory Gene Regulator (Agr) in USA300 and USA400 Community-Associated Methicillin-Resistant Staphylococcus aureus (CA-MRSA)
Source: PubMed Central journal article supplement (PMC9705881; doi:10.4014/jmb.2104.04032), 2021-06-11
Supplement: jmb-31-8-1060-supple.pdf [file jmb-31-8-1060-supple.pdf]

Supplementary data

Table 1. Antibiotic susceptibility test for LAC, LAC $\Delta$ *agr*, MW2, and MW2 $\Delta$ *agr*

| Strain                  | Disk diffusion(30 $\mu$ g) zone diameter (mm) | Broth microdilution MIC( $\mu$ g/mL) |
|-------------------------|-----------------------------------------------|--------------------------------------|
| LAC                     | N/A                                           | > 16 (R)                             |
| LAC $\Delta$ <i>agr</i> | N/A                                           | > 64 (R)                             |
| MW2                     | N/A                                           | > 64 (R)                             |
| MW2 $\Delta$ <i>agr</i> | N/A                                           | >8 (R)                               |

Abbreviations: MIC, minimal inhibitory concentration; N/A, not applicable

Table 2. Logarithmic calculation based on PLFA results

|                                              | Log (LAC $\Delta$ <i>agr</i> /LAC) | Error of Log (LAC $\Delta$ <i>agr</i> /LAC) | Log (MW2/MW2 $\Delta$ <i>agr</i> ) | Error of Log (MW2/MW2 $\Delta$ <i>agr</i> ) |
|----------------------------------------------|------------------------------------|---------------------------------------------|------------------------------------|---------------------------------------------|
| 12-methyl-tridecanoic acid (iso-C14:0)       | 0.146451                           | 0.211533                                    | -0.32311                           | 0.027687                                    |
| Pentadecanoic acid (C15:0)                   | -0.5592                            | 0.166734                                    | -0.248                             | 0.121444                                    |
| 12-methyl-tetradecanoic acid (anteiso-C15:0) | -0.34955                           | 0.075107                                    | 0.187676                           | 0.039979                                    |
| Hexadecanoic acid (C16:0)                    | -0.02803                           | 0.011775                                    | 0.015723                           | 0.202745                                    |
| 14-methyl-pentadecanoic acid (iso-C16:0)     | 0.149186                           | 0.009193                                    | -0.46317                           | 0.085499                                    |
| 15-methyl-hexadecanoic acid (iso-            | 0.347043                           | 0.208346                                    | -0.05115                           | 0.192755                                    |

|                                             |          |          |          |          |
|---------------------------------------------|----------|----------|----------|----------|
| C17:0)                                      |          |          |          |          |
| 14-methyl-hexadecenoic acid (anteiso-C17:0) | 0.355031 | 0.12334  | 0.341866 | 0.031692 |
| 16-methyl-heptadecanoic acid (iso-C18:0)    | 0        | 0.026802 | -        | -        |
| Octadecanoic acid (C18:0)                   | 0.17526  | 0.03927  | -0.13085 | 0.028002 |
| 17-methyl-octadecanoic acid (iso-C19:0)     | -0.19517 | 0.014294 | -        | -        |
| 16-methyl-octadecanoic acid (anteiso-C19:0) | -0.29031 | 0.025749 | 0.132988 | 0.227711 |
| Nonadecanoic acid (C19:0)                   | 0.094847 | 0.044718 | -0.37186 | 0.026944 |
| Eicosanoic acid (C20:0)                     | 0.137964 | 0.030472 | -0.13538 | 0.046588 |
| 12-methyl-tridecanoic acid (iso-C14:0)      | 0.146451 | 0.211533 | -0.32311 | 0.027687 |
